# Supplementary material for: A conserved regulatory mode in exocytic membrane fusion revealed by Mso1p membrane interactions
Source: PubMed Central journal article supplement — Mol Biol Cell. 2013 Feb 1;24(3):331–41. doi: 10.1091/mbc.E12-05-0415 (PMC3564535; doi:10.1091/mbc.e12-05-0415), 2013-02-01
Supplement: supp_E12-05-0415v1_CombinedSupMats.pdf [file supp_E12-05-0415v1_CombinedSupMats.pdf]

## Supplementary Methods

### Circular dichroism spectroscopy

Ultraviolet circular dichroism spectra from 250 to 190 nm were recorded with a JASCO J-810 instrument. The spectra were measured using a 0.1-cm path length quartz cell. The concentration of Mso1p was 10  $\mu\text{M}$  in  $\frac{1}{2}$  PBS buffer. The data are presented as the averages of five scans.

### Supplementary Figure legends

**Supplementary Figure S1.** The localization of Mso1p-Sec1p complexes is affected by a defective Mss4p. (A) BiFC analysis of *MSS4* and *mss4ts* cells expressing YFP(C)-Mso1p and Sec1p-Venus(N). Scale bar 5  $\mu\text{m}$ . (B) Quantification of the Mso1p-Sec1p BiFC signal localization in *MSS4* and *mss4ts* cells. The Mso1p-Sec1p BiFC localization was examined from a minimum of 50 individual cells/condition.

**Supplementary Figure S2.** The lipid specificity of Mso1p. Vesicle co-sedimentation assay reveals that Mso1p doesn't display phosphoinositide-specificity, but the membrane binding is enhanced by phosphoinositides. The final concentrations of proteins and lipids are 3  $\mu\text{M}$  and 500  $\mu\text{M}$ , respectively. The lipid composition is POPC:POPE:POPS:phosphoinositide=50:20:20:10. Error bars are standard deviation.

**Supplementary Figure S3.** Quenching of tryptophan (Trp16 in Mso1p) fluorescence by lipids brominated at positions 5, 6; 9, 10 and 11, 12. The concentrations of proteins and lipid were 0.3  $\mu\text{M}$  and 200  $\mu\text{M}$ , respectively. The lipid composition was POPC:POPE:POPS:PIP2= 50:20:20:10.

**Supplementary Figure S4.** Circular dichroic spectra of wild-type and mutant Mso1p. UV CD spectra from 250 to 190 nm were recorded with a 0.1-cm path length quartz cell. The concentration of Mso1p was 10  $\mu\text{M}$  in  $\frac{1}{2}$  PBS buffer. The data represent the averages of five scans.

A *YC-MSO1-SEC1-VenusN*

*MSS4 wt*

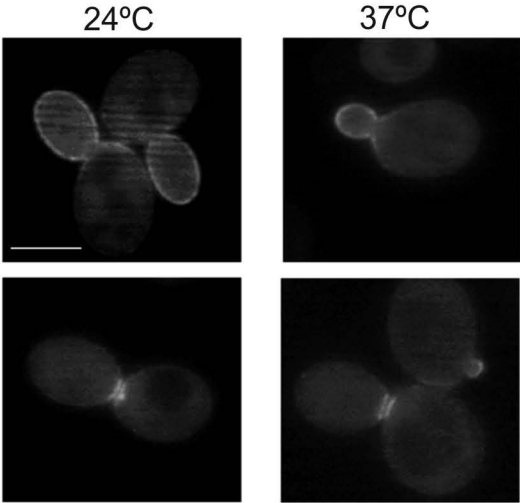

*MSS4 ts*

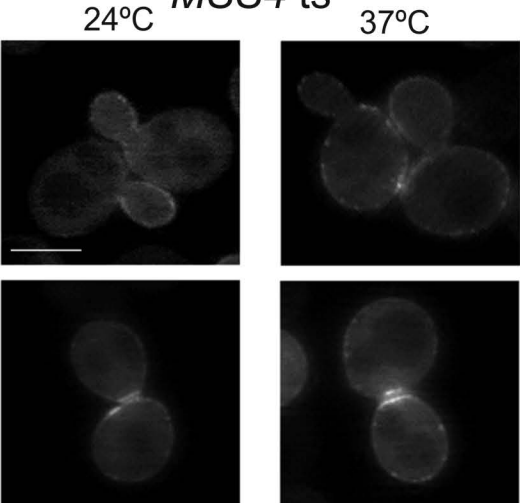

B

| <i>YCMO1-SEC1VenusN</i> |  |  |  |
|-------------------------|-------------------------------------------------------------------------------------|-------------------------------------------------------------------------------------|-------------------------------------------------------------------------------------|
|                         | growing bud                                                                         | septum                                                                              | plasma membrane                                                                     |
| <i>MSS4 wt 24°C</i>     | 0.74                                                                                | 0.23                                                                                | 0.03                                                                                |
| <i>MSS4 wt 37°C</i>     | 0.72                                                                                | 0.23                                                                                | 0.05                                                                                |
| <i>mss4ts 24°C</i>      | 0.62                                                                                | 0.17                                                                                | 0.21                                                                                |
| <i>mss4ts 37°C</i>      | 0.35                                                                                | 0.13                                                                                | 0.52                                                                                |

# Supplementary Figure S2, Weber-Boyvat et al., 2012

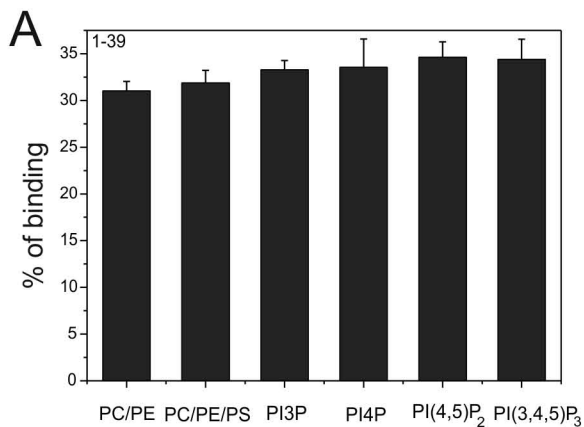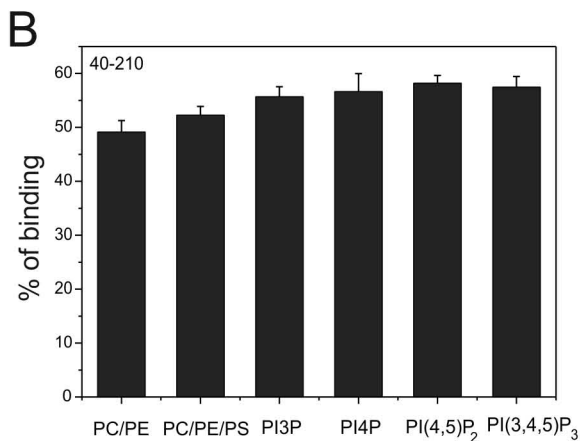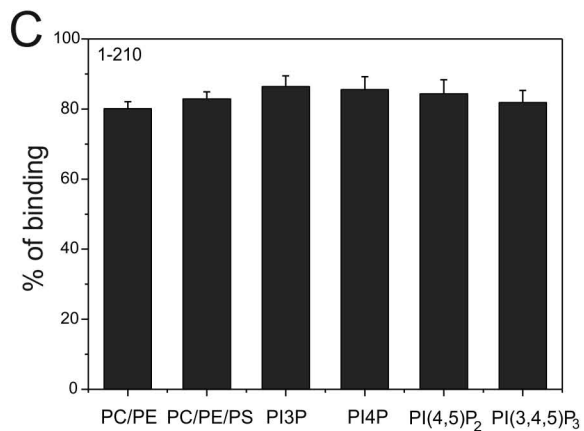

# Supplementary Figure S3, Weber-Boyvat et al., 2012

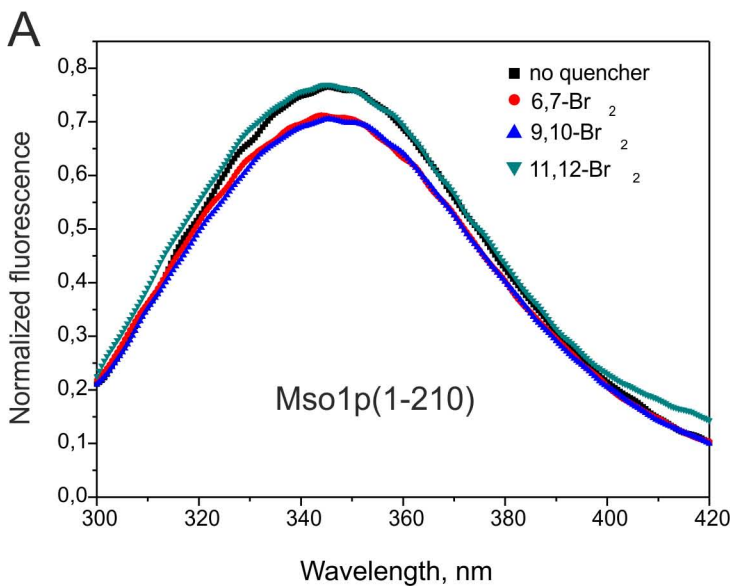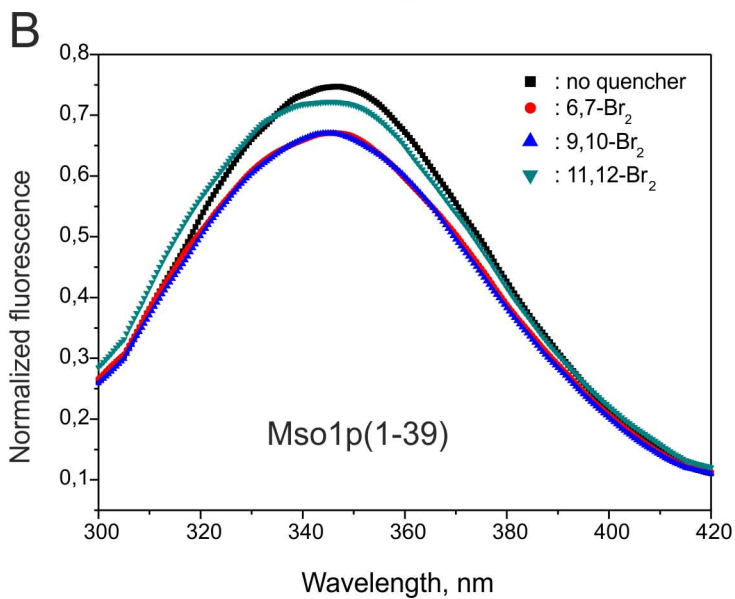

# Supplementary Figure S4, Weber-Boyvat et al., 2012

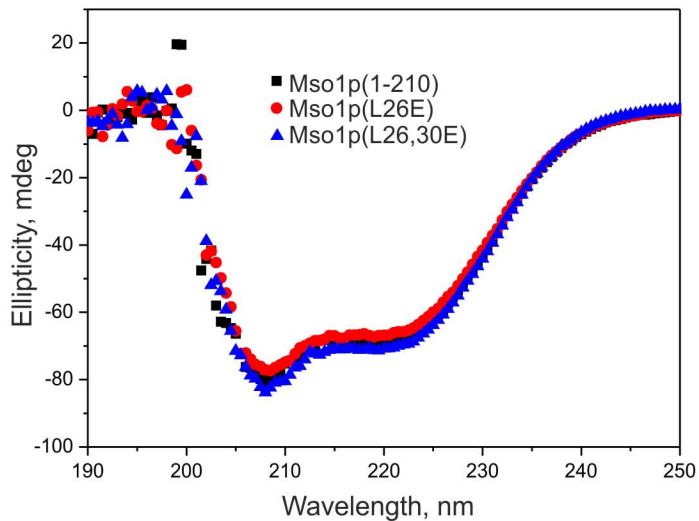

**Supplementary table S1**

| <b>Strain</b>  | <b>Genotype</b>                                                                |                |                 |                                  |               | <b>Source</b>                     |
|----------------|--------------------------------------------------------------------------------|----------------|-----------------|----------------------------------|---------------|-----------------------------------|
| H304           | <i>MATa leu2-3,112 ura3-52</i>                                                 |                |                 |                                  |               | P. Novick                         |
| H2718          | <i>MATa DON1-GFP-kanMX4 SPO21 LEU2 lys2 ura3 KanMx mso1::hphMX4</i>            |                |                 |                                  |               | M. Knop                           |
| H2719          | <i>MATa DON1-GFP-kanMX4 SPO21 leu2 ura3 LYS2 KanMx mso1::hphMX4</i>            |                |                 |                                  |               | M. Knop                           |
| H3742          | <i>MATa ura3-52 leu2-3,112 his3del200 trp1 exo70::HIS3 [exo70-38 CEN TRP1]</i> |                |                 |                                  |               | W. Guo                            |
| H3751          | <i>MATa ade5 his7 met10 trp1 ura3-52 cdc25-2</i>                               |                |                 |                                  |               | Isakoff <i>et al.</i> , 1998      |
| H3788          | <i>MATa leu2-3,112 ura3-52 mss4del::hphNT1 trp1::natNT2 [YCpMSS4-U]</i>        |                |                 |                                  |               | This study                        |
| <b>Plasmid</b> | <b>Name</b>                                                                    | <b>Type</b>    | <b>Promoter</b> | <b>Fragment</b>                  | <b>Marker</b> | <b>Source</b>                     |
| B704           | pRS406                                                                         | <i>Integr.</i> | -               | -                                | <i>URA3</i>   | Sikorski and Hieter. 1989         |
| B1885          | MSO1-Bluescript                                                                | -              | <i>endog.</i>   | <i>MSO1 wt</i>                   | amp           | Knop <i>et al.</i> , 2005         |
| B1944          | YEpMSO1(1-163)-U                                                               | $2\mu$         | <i>ADH1</i>     | <i>MSO1(1-163)</i>               | <i>URA3</i>   | Knop <i>et al.</i> , 2005         |
| B1947          | YEpMSO1(1-78)-U                                                                | $2\mu$         | <i>ADH1</i>     | <i>MSO1(1-78)</i>                | <i>URA3</i>   | Knop <i>et al.</i> , 2005         |
| B1954          | YIpMSO1                                                                        | <i>Integr.</i> | <i>endog.</i>   | <i>MSO1 wt</i>                   | <i>URA3</i>   | Knop <i>et al.</i> , 2005         |
| B2308          | pFA6-hphNTI                                                                    | -              | -               | -                                | amp           | Janke <i>et al.</i> , 2004        |
| B2918          | YCpMSO1-VC-U                                                                   | <i>CEN</i>     | <i>ADH1</i>     | <i>MSO1 wt</i>                   | <i>URA3</i>   | Weber <i>et al.</i> , 2010        |
| B2930          | YCpSEC1-VN-L                                                                   | <i>CEN</i>     | <i>ADH1</i>     | <i>SEC1 wt</i>                   | <i>LEU2</i>   | Weber <i>et al.</i> , 2010        |
| B3019          | C-YN425ADH                                                                     | <i>CEN</i>     | <i>ADH</i>      | -                                | <i>LEU2</i>   | Skarp <i>et al.</i> , 2008        |
| B3022          | pFA6-natNT2                                                                    | -              | -               | -                                | amp           | Janke <i>et al.</i> , 2004        |
| B3031          | p416 MET YC-CDC42                                                              | <i>CEN</i>     | <i>MET25</i>    | <i>CDC42</i>                     | <i>URA3</i>   | Cole <i>et al.</i> , 2007         |
| B3043          | YCpYC-MSO1(136-210)-U                                                          | <i>CEN</i>     | <i>MET25</i>    | <i>MSO1(136-210)</i>             | <i>URA3</i>   | Weber <i>et al.</i> , 2010        |
| B3044          | YCpYC-MSO1-U                                                                   | <i>CEN</i>     | <i>MET25</i>    | <i>MSO1 wt</i>                   | <i>URA3</i>   | Weber <i>et al.</i> , 2010        |
| B3247          | YCpMSS4-U                                                                      | <i>CEN</i>     | <i>endog.</i>   | <i>MSS4 wt</i>                   | <i>URA3</i>   | Stefan <i>et al.</i> , 2002       |
| B3248          | YCplac111mss4ts-102-L                                                          | <i>CEN</i>     | <i>endog.</i>   | <i>mss4 ts</i>                   | <i>LEU2</i>   | Stefan <i>et al.</i> , 2002       |
| B3252          | pGV251                                                                         | $2\mu$         | <i>ADH 1</i>    | -                                | <i>LEU2</i>   | Isakoff <i>et al.</i> , 1998      |
| B3254          | pGV253                                                                         | $2\mu$         | <i>ADH1</i>     | <i>PLC<math>\gamma</math>-PH</i> | <i>LEU2</i>   | Isakoff <i>et al.</i> , 1998      |
| B3269          | YCp-VN-T                                                                       | <i>CEN</i>     | <i>ADH1</i>     | <i>VenusN</i>                    | <i>TRP1</i>   | This study                        |
| B3270          | YCpSEC1-VN-T                                                                   | <i>CEN</i>     | <i>ADH1</i>     | <i>SEC1 wt</i>                   | <i>TRP1</i>   | This study                        |
| B3280          | YCpMSS4-L                                                                      | <i>CEN</i>     | <i>endog.</i>   | <i>MSS4 wt</i>                   | <i>LEU2</i>   | This study                        |
| B3304          | pGV251-MSO1                                                                    | $2\mu$         | <i>ADH1</i>     | <i>MSO1 wt</i>                   | <i>LEU2</i>   | This study                        |
| B3305          | pGV251-MSO1(136-210)                                                           | $2\mu$         | <i>ADH1</i>     | <i>MSO1 (136-210)</i>            | <i>LEU2</i>   | This study                        |
| B3317          | YEpYN-SEC4(Q79L)-L                                                             | $2\mu$         | <i>ADH1</i>     | <i>SEC4(Q79L)</i>                | <i>LEU2</i>   | Weber-Boyvat <i>et al.</i> , 2010 |
| B3336          | pJTAG-MSO1(40-210)                                                             | -              | T7              | <i>MSO1 (40-210)</i>             | amp           | This study                        |
| B3337          | pJTAG-MSO1(59-210)                                                             | -              | T7              | <i>MSO1 (59-210)</i>             | amp           | This study                        |
| B3338          | pJTAG-MSO1(136-210)                                                            | -              | T7              | <i>MSO1 (136-210)</i>            | amp           | This study                        |
| B3339          | pJTAG-MSO1(1-135)                                                              | -              | T7              | <i>MSO1 (1-135)</i>              | amp           | This study                        |
| B3340          | pJTAG-MSO1(1-58)                                                               | -              | T7              | <i>MSO1 (1-58)</i>               | amp           | This study                        |
| B3341          | pJTAG-MSO1(1-39)                                                               | -              | T7              | <i>MSO1 (1-39)</i>               | amp           | This study                        |
| B3342          | pJTAG-MSO1(1-210)                                                              | -              | T7              | <i>MSO1 (1-210)</i>              | amp           | This study                        |
| B3343          | pGV251-MSO1(40-210)                                                            | $2\mu$         | <i>ADH1</i>     | <i>MSO1 (40-210)</i>             | <i>LEU2</i>   | This study                        |
| B3344          | pGV251-MSO1(59-210)                                                            | $2\mu$         | <i>ADH1</i>     | <i>MSO1 (59-210)</i>             | <i>LEU2</i>   | This study                        |
| B3345          | pGV251-MSO1(1-135)                                                             | $2\mu$         | <i>ADH1</i>     | <i>MSO1 (1-135)</i>              | <i>LEU2</i>   | This study                        |
| B3346          | pGV251-MSO1(1-58)                                                              | $2\mu$         | <i>ADH1</i>     | <i>MSO1 (1-58)</i>               | <i>LEU2</i>   | This study                        |
| B3347          | pGV251-MSO1(1-39)                                                              | $2\mu$         | <i>ADH1</i>     | <i>MSO1 (1-39)</i>               | <i>LEU2</i>   | This study                        |
| B3352          | YCpYC-MSO1(40-210)-U                                                           | <i>CEN</i>     | <i>MET25</i>    | <i>MSO1 (40-210)</i>             | <i>URA3</i>   | This study                        |

| B3353   | YCpYC-MSO1(59-210)-U             | <i>CEN</i>     | <i>MET25</i>                  | <i>MSO1(59-210)</i>        | <i>URA3</i> | Weber <i>et al.</i> , 2010 |
|---------|----------------------------------|----------------|-------------------------------|----------------------------|-------------|----------------------------|
| B3354   | YCpYC-MSO1(1-135)-U              | <i>CEN</i>     | <i>MET25</i>                  | <i>MSO1(1-135)</i>         | <i>URA3</i> | Weber <i>et al.</i> , 2010 |
| B3355   | YCpYC-MSO1(1-58)-U               | <i>CEN</i>     | <i>MET25</i>                  | <i>MSO1(1-58)</i>          | <i>URA3</i> | Weber <i>et al.</i> , 2010 |
| B3356   | YCpYC-MSO1(1-39)-U               | <i>CEN</i>     | <i>MET25</i>                  | <i>MSO1 (1-39)</i>         | <i>URA3</i> | This study                 |
| B3410   | MSO1(40-210)-Bluescript          | -              | <i>endog.</i>                 | <i>MSO1 (40-210)</i>       | amp         | This study                 |
| B3411   | YIpMSO1(40-210)                  | <i>Integr.</i> | <i>endog.</i>                 | <i>MSO1 (40-210)</i>       | <i>URA3</i> | This study                 |
| B3427   | pGV251-MSO1(L26E)                | $2\mu$         | <i>ADH1</i>                   | <i>MSO1 (L26E)</i>         | <i>LEU2</i> | This study                 |
| B3428   | pGV251-MSO1(L26,30E)             | $2\mu$         | <i>ADH1</i>                   | <i>MSO1 (L26, 30E)</i>     | <i>LEU2</i> | This study                 |
| B3429   | pJTAG-MSO1(L26E)                 | -              | -                             | <i>MSO1 (L26E)</i>         | amp         | This study                 |
| B3430   | pJTAG-MSO1(L26,30E)              | -              | -                             | <i>MSO1 (L26, 30E)</i>     | amp         | This study                 |
| B3492   | YEpMSO1-YN-L                     | $2\mu$         | <i>ADH1</i>                   | <i>MSO1 wt</i>             | <i>LEU2</i> | This study                 |
| B3494   | YCpYC-MSO1(L26E)-U               | <i>CEN</i>     | <i>MET25</i>                  | <i>MSO1 (L26E)</i>         | <i>URA3</i> | This study                 |
| B3495   | YCpYC-MSO1(L26,30E)-U            | <i>CEN</i>     | <i>MET25</i>                  | <i>MSO1 (L26, 30E)</i>     | <i>URA3</i> | This study                 |
| B3502   | pJTAG-Mint1PTB                   | -              | -                             | <i>Mint1PTB</i>            | amp         | This study                 |
| B3503   | pGV251-Mint1PTB                  | $2\mu$         | <i>ADH1</i>                   | <i>Mint1PTB</i>            | <i>LEU2</i> | This study                 |
| B3505   | pJTAG-MSO1(59-135)               | -              | -                             | <i>MSO1 (59-135)</i>       | amp         | This study                 |
| B3511   | YIpMSO1(L26E)                    | <i>Integr.</i> | <i>endog.</i>                 | <i>MSO1 (L26E)</i>         | <i>URA3</i> | This study                 |
| B3512   | YIpMSO1(L26,30E)                 | <i>Integr.</i> | <i>endog.</i>                 | <i>MSO1 (L26, 30E)</i>     | <i>URA3</i> | This study                 |
| B3531   | pJTAG-Mint1PTB(L473E)            | -              | -                             | <i>Mint1PTB(L473E)</i>     | amp         | This study                 |
| B3532   | pJTAG-Mint1PTB(L473,474E)        | -              | -                             | <i>Mint1PTB(L473,474E)</i> | amp         | This study                 |
| B3606   | YEpMSO1(40-210)U                 | $2\mu$         | <i>ADH1</i>                   | <i>MSO1 (40-210)</i>       | amp         | This study                 |
| Plasmid | Name                             | Species        | Insert                        | Tag                        | Source      |                            |
| B3691   | rMunc18-1-VN                     | rat            | rMunc18-1                     | Venus(N)                   | This study  |                            |
| B3693   | YC-rMint1(full-length)           | rat            | rMint1(full-length)           | Venus(C)                   | This study  |                            |
| B3694   | YC-rMint1(MID+PTB)               | rat            | rMint1(MID+PTB)               | Venus(C)                   | This study  |                            |
| B3695   | YC-rMint1(PTB)                   | rat            | rMint1(PTB)                   | Venus(C)                   | This study  |                            |
| B3696   | mCherry-rMint1(full-length)      | rat            | Mint1(full-length)            | mCherry                    | This study  |                            |
| B3712   | mCherry-rMunc18-1                | rat            | rMunc18-1                     | mCherry                    | This study  |                            |
| B3717   | YC-rMint1(MID)                   | rat            | rMint1(MID)                   | Venus(C)                   | This study  |                            |
| B3750   | YC-rMint1(full-length L473,474E) | rat            | rMint1(full-length L473,474E) | Venus(C)                   | This study  |                            |
| B3751   | YC-rMint1(MID+PTB L473,474E)     | rat            | rMint1(MID+PTB L473,474E)     | Venus(C)                   | This study  |                            |
